# Supplementary material
Source: PubMed Central journal article supplement (PMC7013280)

**A****TUNEL STAIN**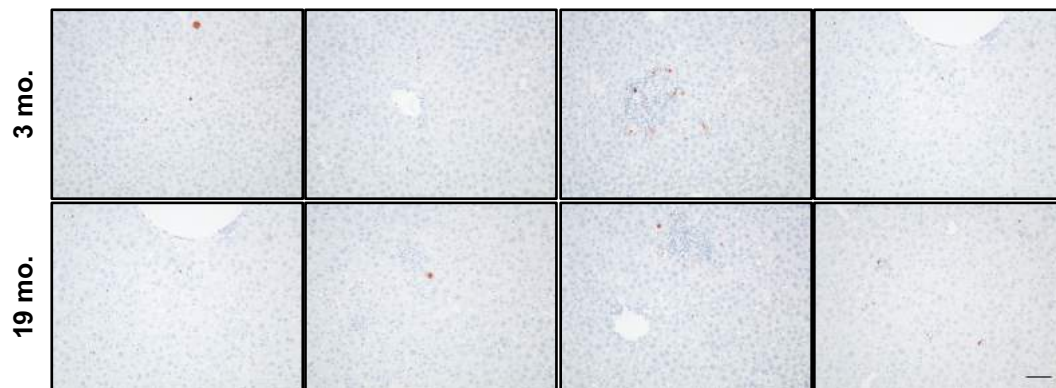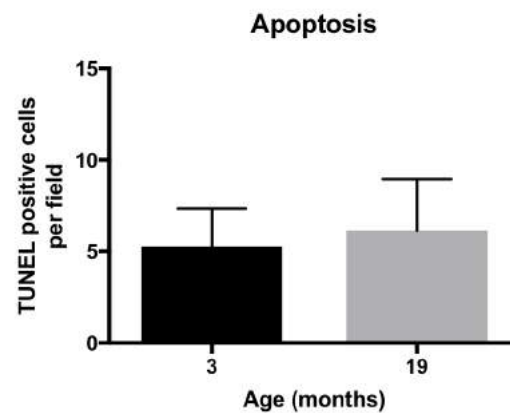**B****PICROSIRIUS RED STAIN**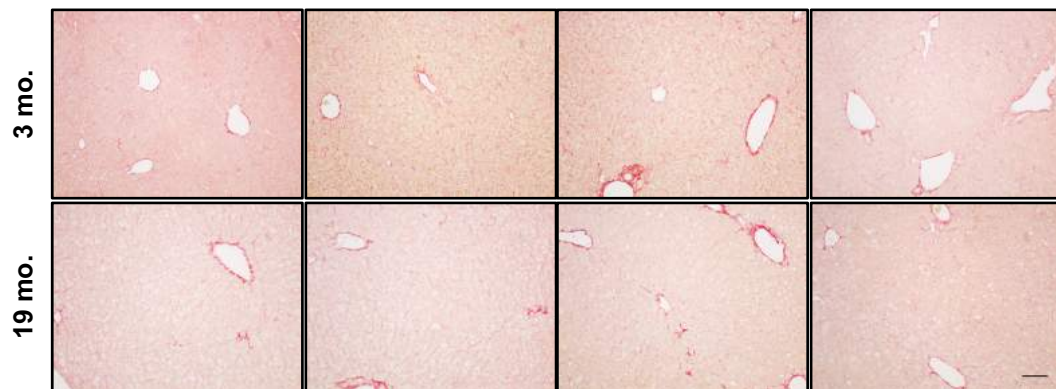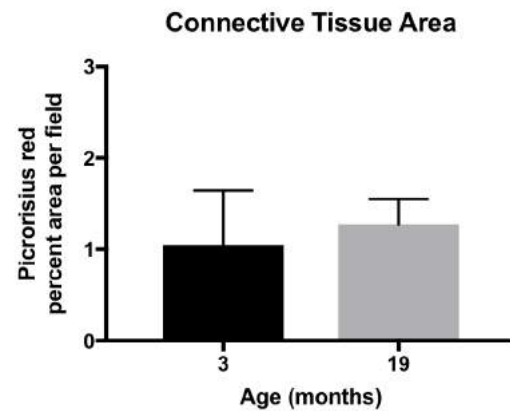

Supplement: mmc1.pdf [file mmc1.pdf]

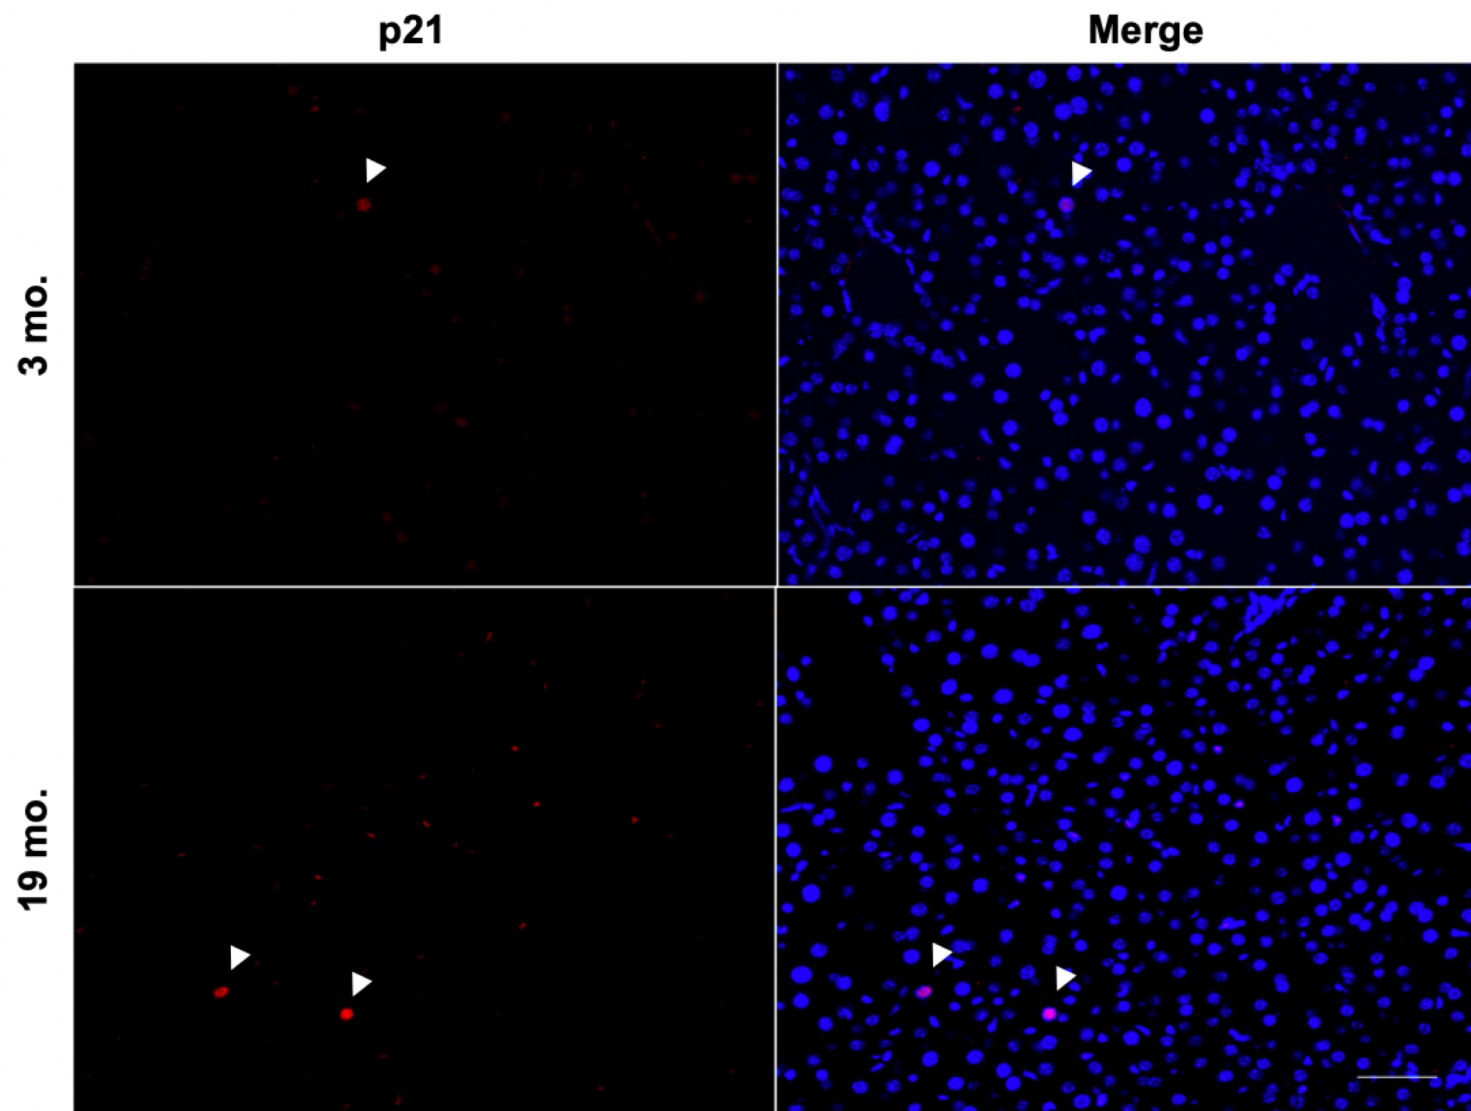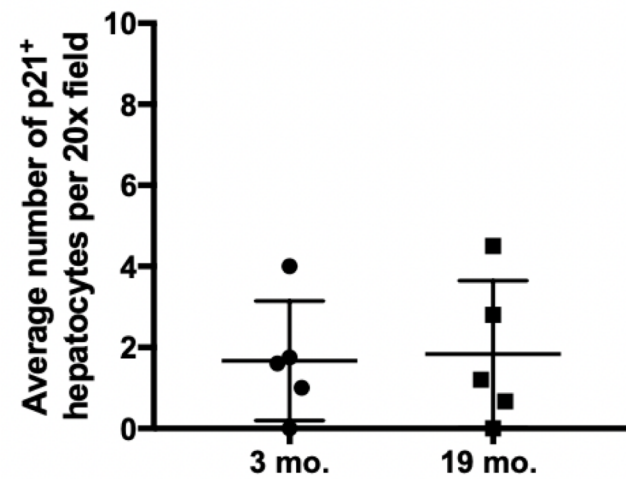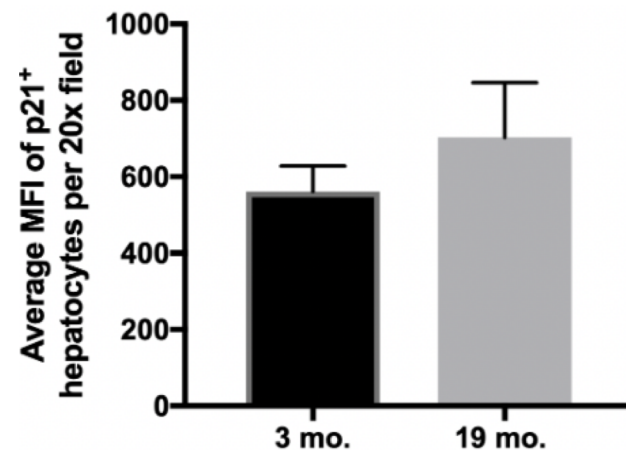

Supplement: mmc2.pdf [file mmc2.pdf]

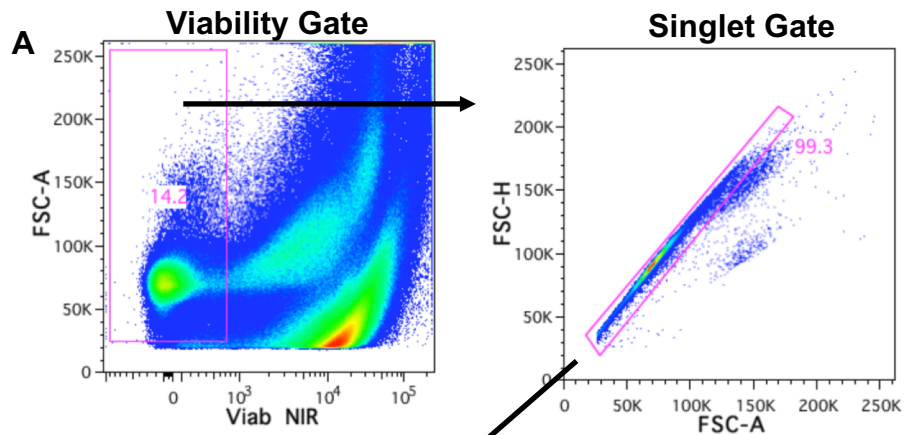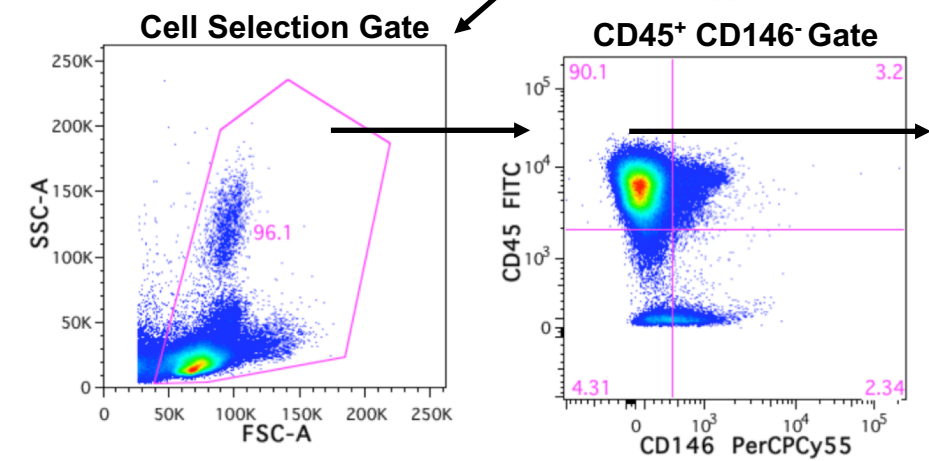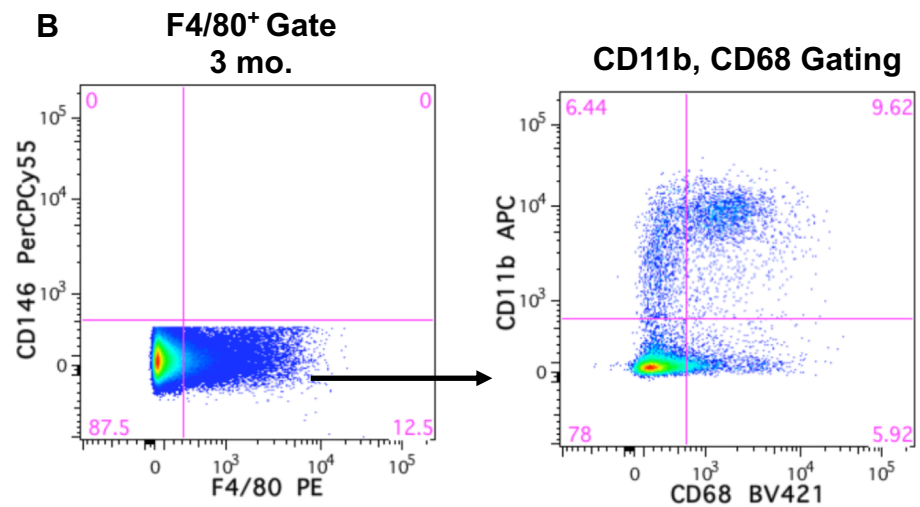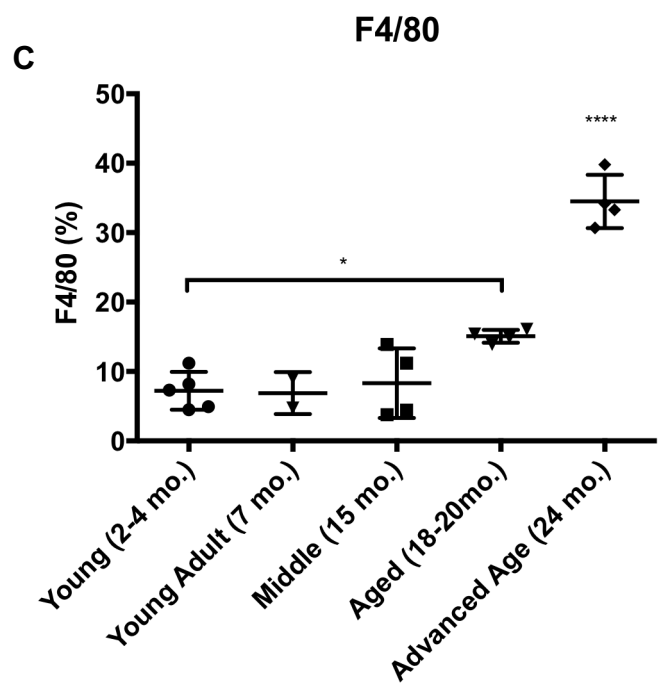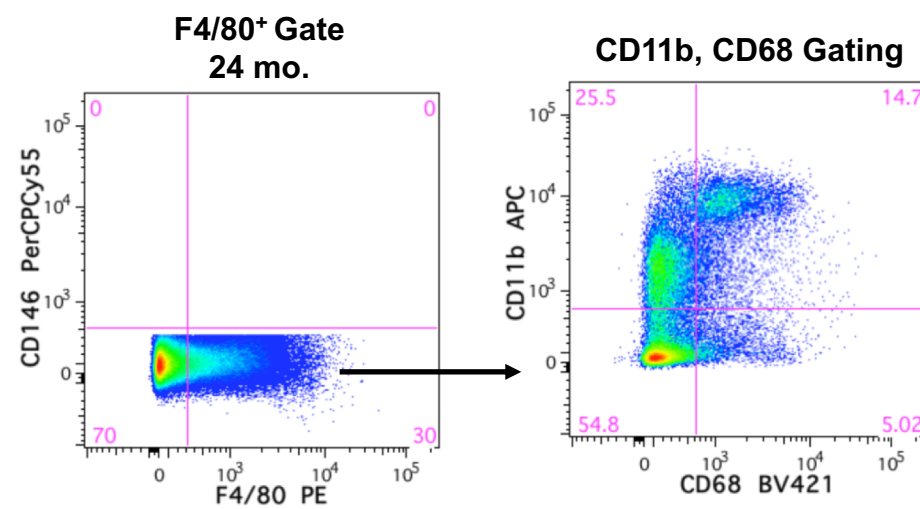

Supplement: mmc3.pdf [file mmc3.pdf]

**A**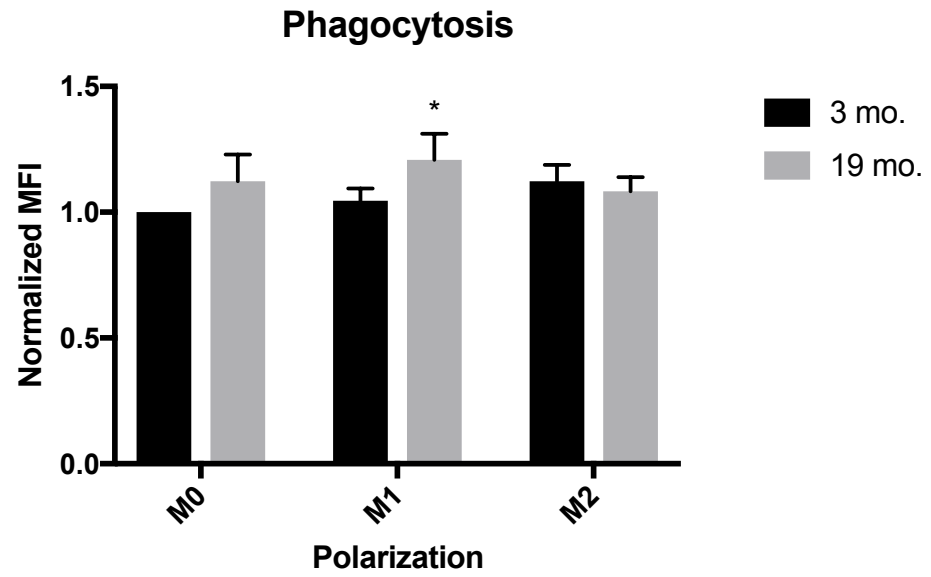**B**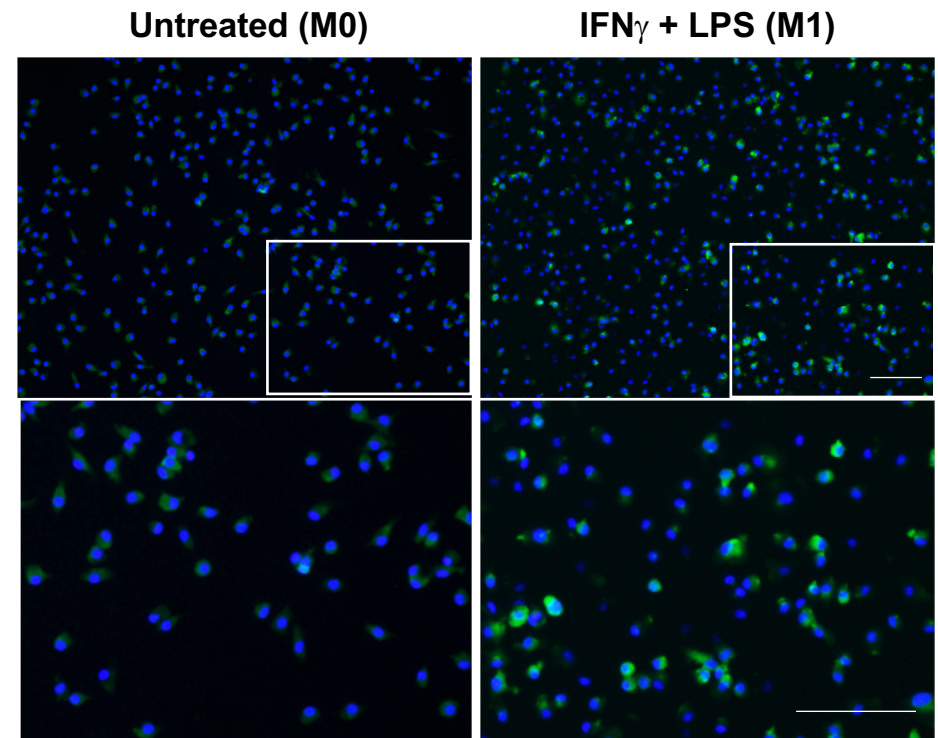

Supplement: mmc4.pdf [file mmc4.pdf]

19 mo. WT JAX #1

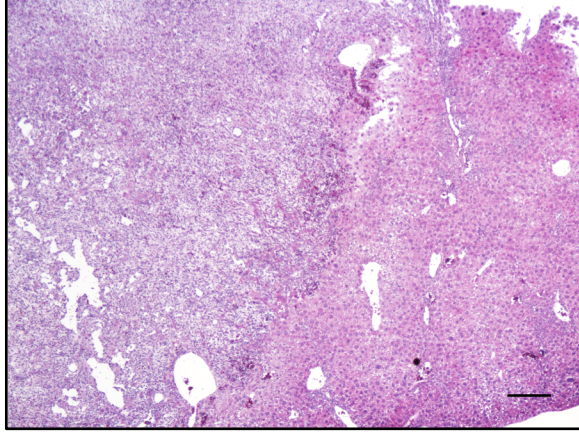

19 mo. WT JAX #2

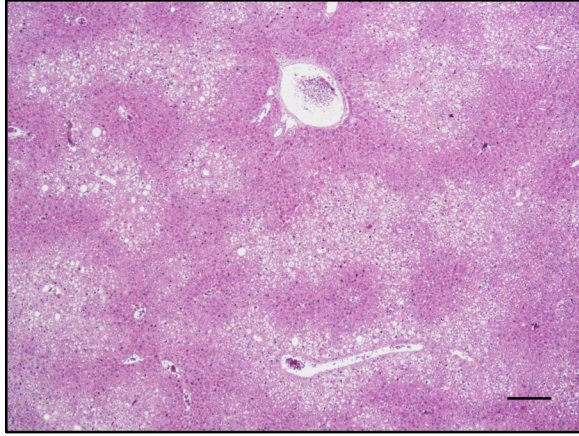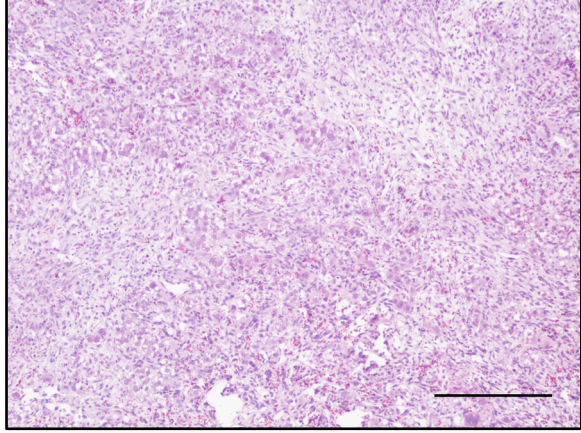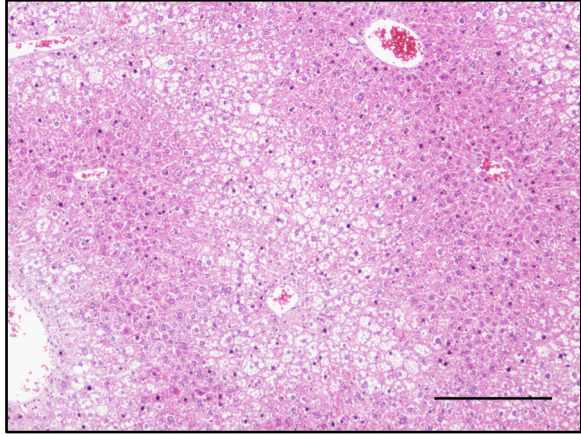

Supplement: mmc5.pdf [file mmc5.pdf]

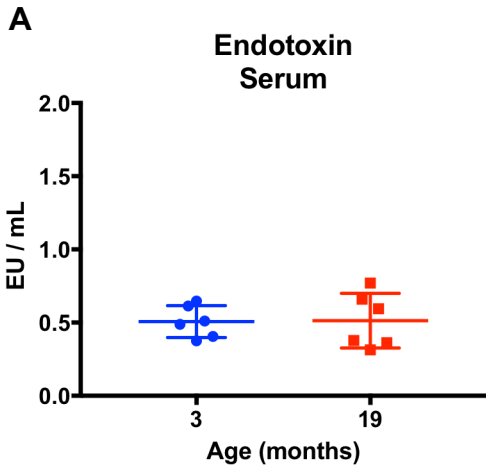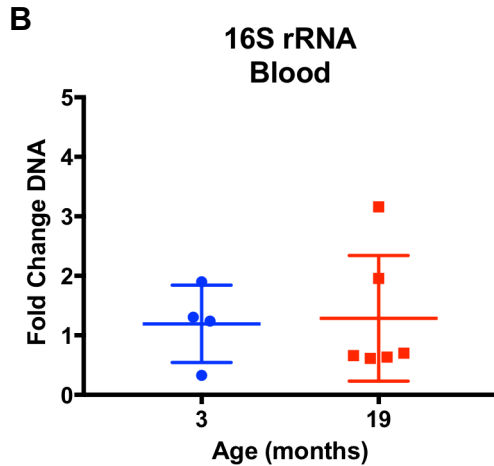

Supplement: mmc6.pdf [file mmc6.pdf]

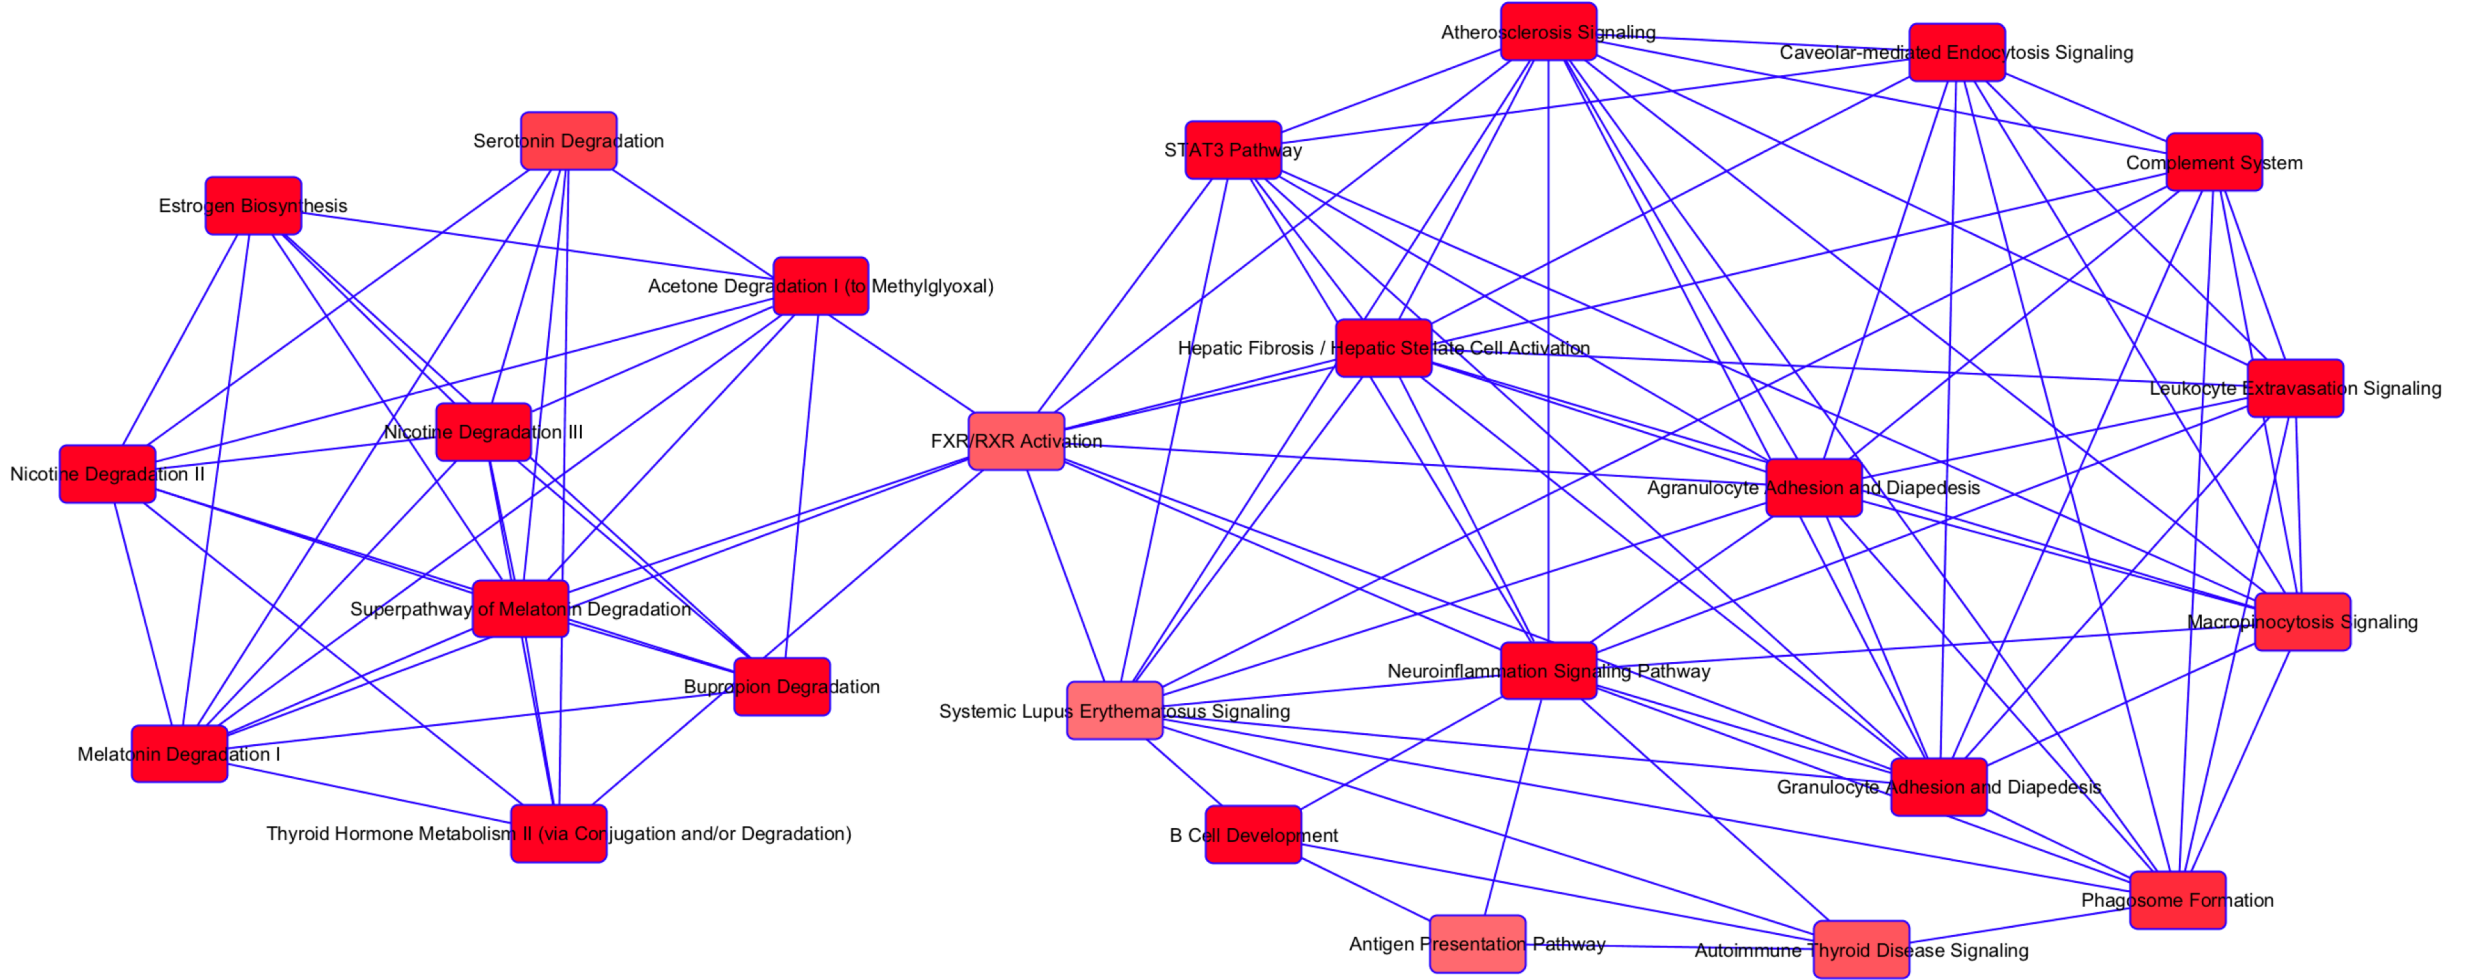

Supplement: mmc7.pdf [file mmc7.pdf]
